# Supplementary material
Source: PubMed Central journal article supplement (PMC4631796)
Supplement: NIHMS726582-supplement-125_2015_3762_MOESM2_ESM.pdf [file NIHMS726582-supplement-125_2015_3762_MOESM2_ESM.pdf]

**ESM Table 2 – association between LDL-C and incident diabetes, adjusted for various variables**

| <b>Adjusted for</b>                            | <b>Odds ratio of incident diabetes, per standard deviation high LDL-C concentration</b> |
|------------------------------------------------|-----------------------------------------------------------------------------------------|
| Age, sex                                       | 0.97 (0.87-1.08)                                                                        |
| Age, sex, fasting glucose, and body mass index | 0.88 (0.77-1.01)                                                                        |
