# Supplementary material
Source: PubMed Central journal article supplement (PMC4631796)
Supplement: NIHMS726582-supplement-125_2015_3762_MOESM5_ESM.pdf [file NIHMS726582-supplement-125_2015_3762_MOESM5_ESM.pdf]

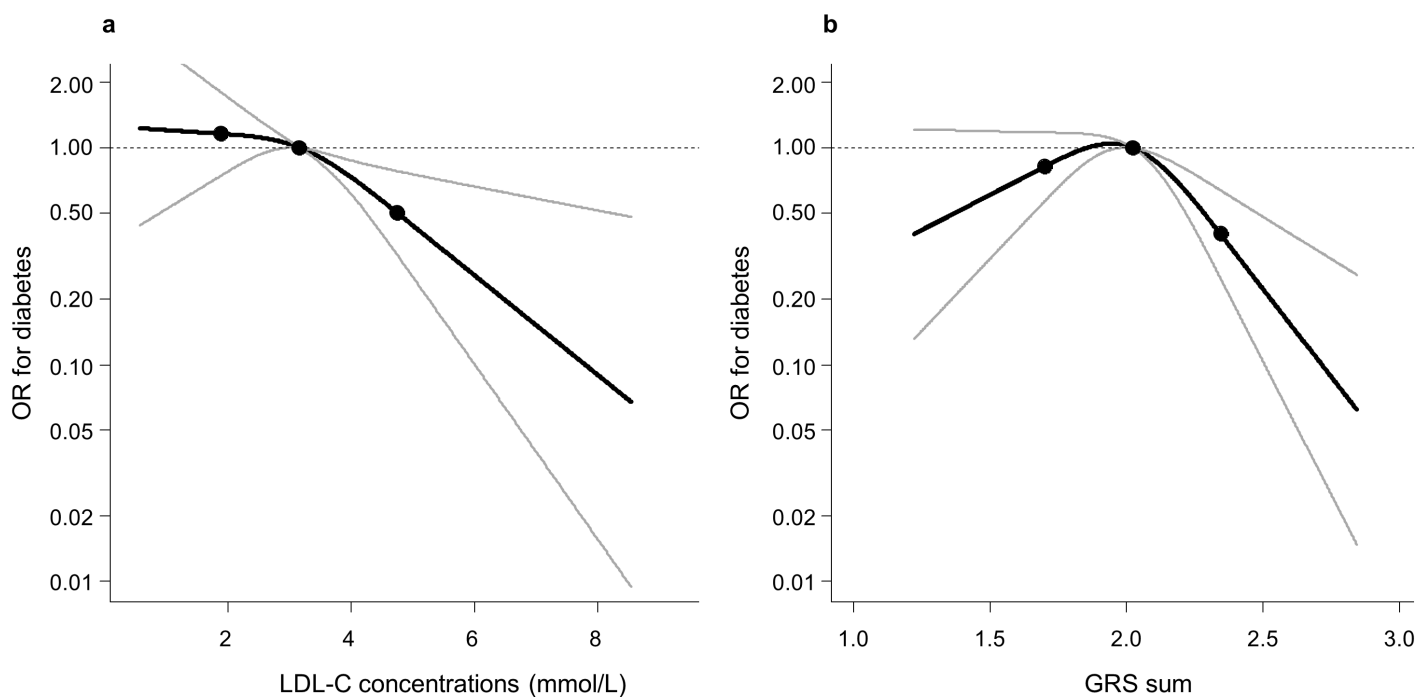

**ESM Figure 1:** Splines illustrating the odds ratio of developing diabetes for a. Total cholesterol concentrations, and b. a genetic risk score (GRS) underlying total cholesterol concentrations. Knots are placed at 5<sup>th</sup>, 50<sup>th</sup>, and 95<sup>th</sup> percentiles. Both models were adjusted for time between examinations, examination, HDL-C and triacylglycerol concentrations, sex, age, BMI, systolic and diastolic blood pressures, and fasting blood glucose levels. p for overall association 0.011 (a) and 0.0002 (b), respectively. p for non-linearity 0.14 (a) and 0.0001 (b), respectively.
